# Supplementary material for: CREB3L3 controls fatty acid oxidation and ketogenesis in synergy with PPARα
Source: PubMed Central journal article supplement (PMC5159891; doi:10.1038/srep39182), 2016-12-16
Supplement: srep39182-s1.pdf [file srep39182-s1.pdf]

## Supplementary Information

### **CREB3L3 controls fatty acid oxidation and ketogenesis in synergy with PPAR $\alpha$**

<sup>1,2,\*</sup>Yoshimi Nakagawa, <sup>1</sup>Aoi Satoh, <sup>1</sup>Hitomi Tezuka, <sup>1</sup>Song-iee Han, <sup>1</sup>Kenta Takei, <sup>1</sup>Hitoshi Iwasaki, <sup>1</sup>Shigeru Yatoh, <sup>1</sup>Naoya Yahagi, <sup>1</sup>Hiroaki Suzuki, <sup>3</sup>Yasumasa Iwasaki, <sup>4</sup>Hirohito Sone, <sup>1</sup>Takashi Matsuzaka, <sup>1</sup>Nobuhiro Yamada, <sup>1,2,5,\*</sup>Hitoshi Shimano

<sup>1</sup>Department of Internal Medicine (Endocrinology and Metabolism), Faculty of Medicine, University of Tsukuba, Tsukuba, Ibaraki 305-8575, Japan

<sup>2</sup>International Institute for Integrative Sleep Medicine (WPI-IIS), University of Tsukuba, Tsukuba, Ibaraki 305-8575, Japan

<sup>3</sup>Health Care Center, Kochi University, Kochi Medical School, Kochi, Kochi 780-8520, Japan

<sup>4</sup>Department of Hematology, Endocrinology and Metabolism, Niigata University Faculty of Medicine, Niigata, Niigata 951-8510, Japan

<sup>5</sup>Life Science Center, Tsukuba Advanced Research Alliance (TARA), University of Tsukuba, Tsukuba 305-8577, Japan

\*Correspondence: ynakagawa@md.tsukuba.ac.jp (Y.N), hshimano@md.tsukuba.ac.jp (H.S.)

**Fig. 1b**

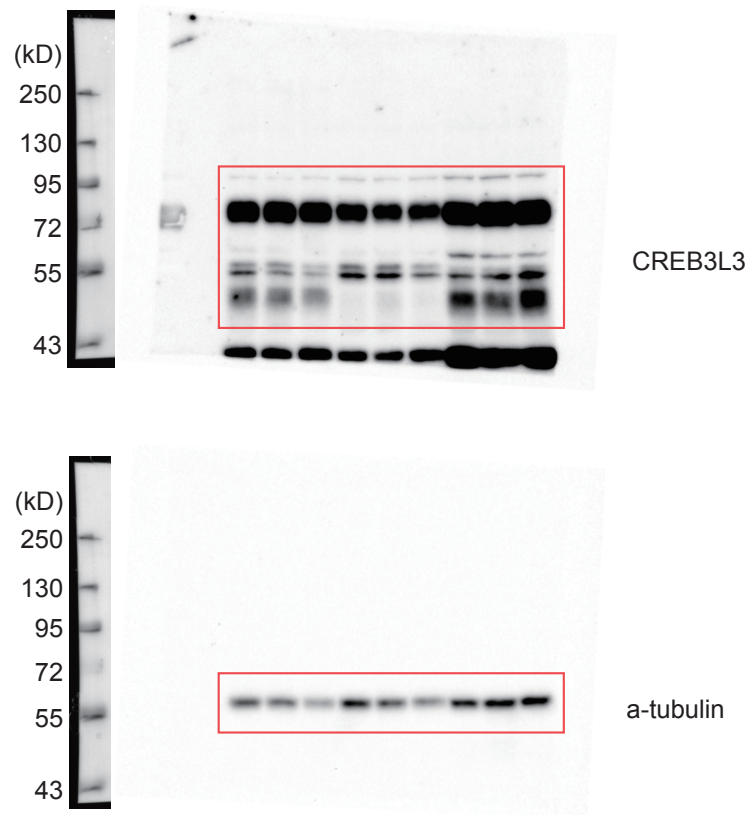

Supplementary Figure 1. Representative not cropped Western blots corresponding to Figure 1b.
